# Supplementary material for: CA2 neuronal activity controls hippocampal low gamma and ripple oscillations
Source: eLife. 2018 Nov 2;7:e38052. doi: 10.7554/eLife.38052 (PMC6251629; doi:10.7554/eLife.38052)
Supplement: Supplementary file 1. [file elife-38052-supp1.xlsx]

## Sheet: Sheet1
Values used to generate bar graphs in main text
Figure	Treatment	Mean	SEM	Biological Replicate (N)	Values for each biological replicate (N)
2Bii	Vehicle	0.03051	0.008857	8	0.0316677	0.016293	0.0152622	0.024562	0.017313	0.009327	0.043079	0.086557
2Bii	0.5 mg/kg	0.02688	0.008484	8	0.0303907	0.010163	0.0142936	0.024429	0.014203	0.012626	0.0254	0.083523
2Bii	1 mg/kg	0.03389	0.008442	8	0.0517832	0.016258	0.0177015	0.022833	0.030606	0.01326	0.034388	0.084278
2Bii	2 mg/kg	0.03456	0.008622	8	0.0443462	0.018644	0.00868768	0.034284	0.043144	0.00918	0.03438	0.083816
2Bii	4 mg/kg	0.02731	0.009272	8	0.0541702	0.006454	0.00727775	0.015409	0.029589	0.005307	0.022027	0.078279
2Biii	Vehicle	0.003232	0.0002763	8	0.00328289	0.00213633	0.00300079	0.003368	0.00408466	0.004468	0.00314	0.002374
2Biii	0.5 mg/kg	0.004601	0.0004629	8	0.00357707	0.004726	0.00440916	0.00607	0.006589	0.004825	0.004135	0.002475
2Biii	1 mg/kg	0.004709	0.0005594	8	0.00324338	0.004507	0.0048363	0.006444	0.005593	0.006825	0.004096	0.002125
2Biii	2 mg/kg	0.00528	0.0004894	8	0.00550954	0.006943	0.00708554	0.0057	0.004575	0.005063	0.004549	0.002814
2Biii	4 mg/kg	0.007097	0.001052	8	0.00437768	0.006553	0.00780586	0.012413	0.009028	0.008607	0.004375	0.003615
2Biv	Vehicle	0.001157	0.0002263	8	0.00081355	0.000356	0.00111136	0.002122	0.001764	0.001612	0.001089	0.000385
2Biv	0.5 mg/kg	0.001374	0.0002395	8	0.00077623	0.000578	0.00192584	0.001388	0.002331	0.002093	0.001203	0.000699
2Biv	1 mg/kg	0.001436	0.0002125	8	0.000479962	0.001917	0.00220711	0.001519	0.001621	0.001901	0.000929	0.000913
2Biv	2 mg/kg	0.00183	0.0003693	8	0.000845082	0.002535	0.00343311	0.001316	0.00181	0.003009	0.000875	0.000814
2Biv	4 mg/kg	0.00173	0.0003169	8	0.000804497	0.002224	0.00317025	0.001524	0.002115	0.002424	0.000877	0.000705
2Cii	Vehicle	0.02582	0.004619	8	0.030152	0.028171	0.025613	0.015933	0.014686	0.010802	0.028594	0.052573
2Cii	0.5 mg/kg	0.01877	0.003273	8	0.029078	0.013989	0.016453	0.012263	0.011409	0.008277	0.025232	0.033497
2Cii	1 mg/kg	0.01872	0.003784	8	0.034787	0.005651	0.014967	0.011006	0.020804	0.008389	0.022113	0.032016
2Cii	2 mg/kg	0.01696	0.004223	8	0.029586	0.002296	0.010773	0.01599	0.01335	0.006446	0.018898	0.038354
2Cii	4 mg/kg	0.01537	0.003408	8	0.02264	0.002818	0.008953	0.014426	0.014246	0.005075	0.02775	0.027089
2Ciii	Vehicle	0.00319	0.0003007	8	0.002732	0.003222	0.002732	0.00474	0.003862	0.003589	0.002557	0.002082
2Ciii	0.5 mg/kg	0.005231	0.001016	8	0.002377	0.003417	0.004724	0.011439	0.005487	0.006879	0.003275	0.004246
2Ciii	1 mg/kg	0.007103	0.001193	8	0.002816	0.00629	0.006392	0.013108	0.007486	0.010314	0.003413	0.007001
2Ciii	2 mg/kg	0.008934	0.0008795	8	0.007664	0.007277	0.0079	0.014257	0.009712	0.010019	0.006189	0.008451
2Ciii	4 mg/kg	0.01086	0.001193	8	0.012186	0.007503	0.008907	0.015395	0.013388	0.013447	0.005467	0.010603
2Civ	Vehicle	0.000979	0.0001761	8	0.000549	0.000835	0.000807	0.001634	0.001463	0.001533	0.000708	0.000303
2Civ	0.5 mg/kg	0.0012	0.0001826	8	0.000469	0.001735	0.001451	0.001421	0.001536	0.00167	0.000755	0.000566
2Civ	1 mg/kg	0.001356	0.0002269	8	0.000401	0.002321	0.001843	0.001638	0.00145	0.001619	0.000832	0.000747
2Civ	2 mg/kg	0.001493	0.0002576	8	0.000776	0.002649	0.00243	0.001491	0.001368	0.001615	0.000911	0.000706
2Civ	4 mg/kg	0.001613	0.0002358	8	0.00104	0.002375	0.0026	0.001561	0.001658	0.001931	0.000957	0.000779
2Dlow	Vehicle	0.003562	0.0002594	4	0.003096	0.003611	0.00327	0.004271
2Dlow	0.5 mg/kg	0.003267	0.0002032	4	0.002688	0.003578	0.003281	0.003519
2Dlow	1 mg/kg	0.003489	8.47e-05	4	0.00325	0.00359	0.003626	0.003491
2Dlow	2 mg/kg	0.00366	5.051e-05	4	0.003591	0.003556	0.00376	0.003731
2Dlow	4 mg/kg	0.003456	0.0001749	4	0.003179	0.003467	0.003232	0.003946
2Dhigh	Vehicle	0.0008468	6.183e-05	4	0.000702	0.000826	0.000856	0.001003
2Dhigh	0.5 mg/kg	0.0008963	6.102e-05	4	0.000748	0.000846	0.001011	0.00098
2Dhigh	1 mg/kg	0.0008885	9.117e-05	4	0.000725	0.000855	0.000825	0.001149
2Dhigh	2 mg/kg	0.0009175	5.845e-05	4	0.000925	0.00085	0.000816	0.001079
2Dhigh	4 mg/kg	0.0008705	3.958e-05	4	0.000796	0.00083	0.000878	0.000978
3B	Vehicle	0.002684	0.0002179	4	0.002488	0.002301	0.002644	0.003303
3B	0.5 mg/kg	0.003651	0.0004255	4	0.003021	0.002854	0.004613	0.004115
3B	1 mg/kg	0.004785	0.0009445	4	0.003213	0.003435	0.007281	0.005211
3B	2 mg/kg	0.005817	0.001224	4	0.003755	0.003762	0.008589	0.007162
3B	4 mg/kg	0.006132	0.0009976	4	0.00426	0.004973	0.008766	0.006529
3C	Vehicle	0.002664	0.0002845	4	0.001982	0.0025	0.003333	0.002842
3C	0.5 mg/kg	0.004916	0.001798	4	0.002284	0.003006	0.010179	0.004194
3C	1 mg/kg	0.005659	0.00209	4	0.002954	0.003038	0.011788	0.004857
3C	2 mg/kg	0.007874	0.002086	4	0.006304	0.003238	0.013096	0.008858
3C	4 mg/kg	0.008251	0.001506	4	0.00689	0.00505	0.012067	0.008998
3D	Vehicle	0.001998	0.0005194	4	0.00081	0.001445	0.002933	0.002802
3D	0.5 mg/kg	0.001887	0.0004702	4	0.000847	0.00134	0.002756	0.002606
3D	1 mg/kg	0.001697	0.0003753	4	0.000882	0.001338	0.002606	0.001963
3D	2 mg/kg	0.002107	0.0006339	4	0.00089	0.001137	0.003271	0.003129
3D	4 mg/kg	0.001685	0.0003396	4	0.000912	0.001318	0.002275	0.002236
3E	Vehicle	0.00273	0.0002557	3	0.003203	0.002663	0.002325
3E	0.5 mg/kg	0.00263	0.000485	3	0.003599	0.002177	0.002113
3E	1 mg/kg	0.002671	0.000287	3	0.003213	0.002236	0.002565
3E	2 mg/kg	0.002595	0.0003501	3	0.003285	0.002355	0.002146
3E	4 mg/kg	0.0029	0.0002111	3	0.003307	0.002599	0.002794
3F	Vehicle	0.6047	0.02904	4	0.580719	0.662108	0.534643	0.641311
3F	0.5 mg/kg	0.6177	0.03197	4	0.540482	0.663122	0.590303	0.676768
3F	1 mg/kg	0.644	0.01513	4	0.61569	0.66356	0.620853	0.676076
3F	2 mg/kg	0.6737	0.02799	4	0.64348	0.70527	0.611912	0.734333
3F	4 mg/kg	0.7074	0.02562	4	0.734147	0.740842	0.631327	0.723405
3G	Vehicle	0.6231	0.01697	4	0.600596	0.666398	0.59199	0.633361
3G	0.5 mg/kg	0.6587	0.01354	4	0.618594	0.667376	0.670548	0.678107
3G	1 mg/kg	0.6687	0.01642	4	0.62387	0.699726	0.666448	0.684797
3G	2 mg/kg	0.7379	0.01248	4	0.750708	0.704528	0.734541	0.762012
3G	4 mg/kg	0.739	0.0119	4	0.772792	0.71951	0.737952	0.725688
3H	Vehicle	0.5943	0.02828	4	0.654941	0.557091	0.53638	0.628675
3H	0.5 mg/kg	0.5796	0.01931	4	0.626389	0.548526	0.547355	0.596318
3H	1 mg/kg	0.5839	0.03152	4	0.677949	0.554571	0.544005	0.55896
3H	2 mg/kg	0.5741	0.02453	4	0.646701	0.548172	0.541093	0.560384
3H	4 mg/kg	0.5674	0.02631	4	0.646011	0.545321	0.534553	0.543791
4C	Vehicle	0.2611	0.01498	8	0.2201	0.3067	0.2694	0.2571	0.2118	0.2791	0.2187	0.3257
4C	CNO	0.1828	0.01002	8	0.1725	0.1592	0.2214	0.1436	0.1591	0.208	0.2091	0.1895
4D	Vehicle	0.5782	0.05588	8	0.3977	0.3659	0.6017	0.4944	0.5622	0.7965	0.632225	0.7752
4D	CNO	0.5951	0.05459	8	0.3411	0.6747	0.4224	0.6497	0.4913	0.7208	0.7353	0.7254
4E	Vehicle	0.2452	0.02422	4	0.3096	0.2214	0.2522	0.1975
4E	CNO	0.2584	0.01838	4	0.3045	0.25	0.2635	0.2156
4F	Vehicle	0.4152	0.02579	4	0.4109	0.4603	0.4452	0.3443
4F	CNO	0.4264	0.02807	4	0.3452	0.474	0.4387	0.4475
5Aii	Vehicle	0.03434	0.003931	8	0.0316	0.0359	0.0435982	0.0439	0.0203	0.0492	0.0318	0.0184
5Aii	CNO	0.03244	0.00355	8	0.033	0.0463	0.0305289	0.0408	0.0203	0.0412	0.0293	0.0181
5Aiii	Vehicle	0.003283	0.0003969	8	0.002784	0.00162	0.00457	0.00503	0.00243	0.00373	0.0028723	0.00323
5Aiii	CNO	0.002777	0.0003304	8	0.002245	0.00133	0.00367	0.00401	0.00207	0.00351	0.00226456	0.00312
5Aiv	Vehicle	0.001404	0.0002697	8	0.001903	0.000429	0.00178	0.000888	0.00121	0.000816	0.00284657	0.00136
5Aiv	CNO	0.001269	0.0002661	8	0.001411	0.000313	0.00145	0.000847	0.00104	0.000821	0.0028662	0.0014
5Bii	Vehicle	0.02814	0.004202	8	0.019837	0.0198565	0.0405835	0.03582	0.032	0.0131	0.0455	0.0184
5Bii	CNO	0.03494	0.003332	8	0.027179	0.038385	0.0464311	0.0324577	0.0421	0.0318	0.0431	0.0181
5Biii	Vehicle	0.003473	0.0003643	8	0.003319	0.00547333	0.0022042	0.004147	0.00368	0.00345	0.00239	0.00312
5Biii	CNO	0.003403	0.0003192	8	0.003091	0.00489301	0.00179798	0.00401936	0.00325	0.0039	0.00304	0.00323
5Biv	Vehicle	0.001093	0.0002112	8	0.002297	0.00108459	0.000505701	0.00107712	0.000684	0.00125	0.000448	0.0014
5Biv	CNO	0.001107	0.0002713	8	0.002748	0.00122463	0.000325869	0.000814352	0.000601	0.00128	0.000499	0.00136
5Dii	Vehicle	0.00218	0.0002144	6	0.00193	0.00292	0.00274	0.00198	0.00192	0.00159
5Dii	CNO	0.001943	0.0002023	6	0.00179	0.00276	0.00231	0.00174	0.00143	0.00163
5Diii	Vehicle	0.0009395	0.0001011	6	0.000983	0.00136	0.000929	0.000981	0.000648	0.000736
5Diii	CNO	0.00097	8.861e-05	6	0.000955	0.00136	0.000881	0.00103	0.000874	0.00072
5Eii	Vehicle	0.003065	0.0003783	5	0.00275	0.00194	0.003096	0.00327	0.004271
5Eii	CNO	0.002977	0.0003308	5	0.00252	0.00201	0.003179	0.003232	0.003946
6C	Vehicle	0.2482	0.03267	6	0.2207	0.1971	0.2764	0.1712	0.395	0.2287
6C	CNO	0.3139	0.02568	6	0.2958	0.275	0.3496	0.3014	0.4201	0.2414
6D	Vehicle	0.5115	0.02276	6	0.5944	0.4811	0.469	0.4939	0.4625	0.5682
6D	CNO	0.5864	0.02833	6	0.6243	0.6215	0.4833	0.5189	0.6083	0.6622
6E	Vehicle	0.2041	0.0121	6	0.1655	0.1984	0.1896	0.2214	0.2522	0.1975
6E	CNO	0.2094	0.0193	6	0.2001	0.1889	0.1999	0.1731	0.3037	0.1905
6F	Vehicle	0.5029	0.06162	6	0.4824	0.3512	0.632	0.5751	0.3037	0.673
6F	CNO	0.4555	0.03704	6	0.5002	0.4141	0.3702	0.421	0.6191	0.4084
